# Supplementary material for: Inhibition of Acetylcholinesterase by Novel Lupinine Derivatives
Source: MDPI journal article supplement (doi:10.3390/molecules28083357), 2023-04-11
Supplement: s1 [file s1]

## Supplementary Material

### Inhibition of Acetylcholinesterase by Novel Lupinine Derivatives

Igor A. Schepetkin<sup>1</sup>, Zhangeldy S. Nurmaganbetov<sup>2,3</sup>, Serik D. Fazylov<sup>2</sup>, Oralgazy A. Nurkenov<sup>2</sup>, Andrei I. Khlebnikov<sup>4</sup>, Tulegen M. Seilkhanov<sup>5</sup>, Anarkul S. Kishkentaeva<sup>2</sup>,  
Elvira E. Shults<sup>6</sup>, and Mark T. Quinn<sup>1</sup>

<sup>1</sup>*Department of Microbiology and Cell Biology, Montana State University, Bozeman, MT 59717, USA*

<sup>2</sup>*Institute of Organic Synthesis and Coal Chemistry, Karaganda 100008, Kazakhstan*

<sup>3</sup>*Karaganda Medical University, Karaganda 100012, Kazakhstan*

<sup>4</sup>*Kizhner Research Center, Tomsk Polytechnic University, Tomsk 634050, Russia*

<sup>5</sup>*Sh. Ualikhanov Kokshetau University, Kokshetau 020000, Kazakhstan*

<sup>6</sup>*N.N. Vorozhtsov Novosibirsk Institute of Organic Chemistry, Siberian Branch of the Russian Academy of Sciences, Novosibirsk 630090, Russia*

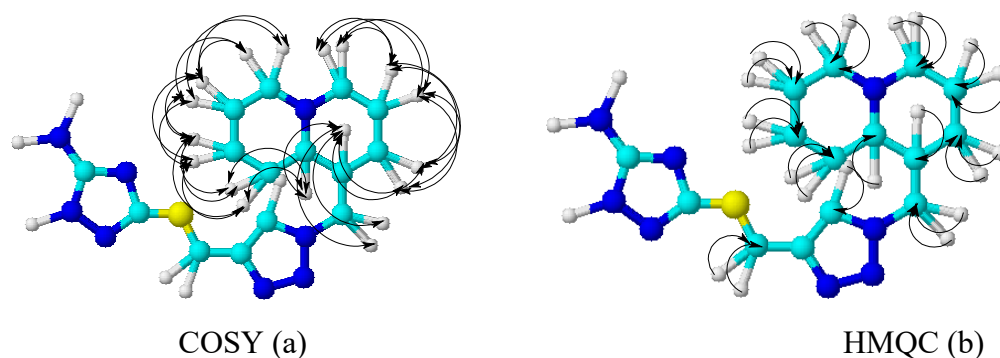

**Supplementary Figure S1. Scheme of correlations in the COSY (a) and HMQC (b) spectra of compound 5.**

$^1\text{H}$ - $^1\text{H}$  COSY spectra of the compound showed the spin-spin couplings through three bonds of the neighboring methine proton of the lupinine cycle with the methylene proton  $\text{H}^5$ - $\text{H}^{11}$  (2.05, 4.39 and 4.39, 2.05) and the methylene-methylene protons of the lupinine cycles of  $\text{H}^{2\text{ax},10\text{ax}}$ - $\text{H}^{2\text{eq},10\text{eq}}$  (1.88, 2.73 and 2.73, 1.88) ppm. The heteronuclear couplings of protons with carbon atoms through a single bond were established by  $^1\text{H}$ - $^{13}\text{C}$  HMQC spectroscopy for the following pairs in the compound:  $\text{H}^{3\text{ax}}$ - $\text{C}^3$  (1.27, 20.64),  $\text{H}^{4\text{ax}}$ - $\text{C}^4$  (1.39, 29.06),  $\text{H}^{2\text{ax},10\text{ax}}$ - $\text{C}^{2,10}$  (1.83, 56.82),  $\text{H}^6$ - $\text{C}^6$  (2.02, 64.17),  $\text{H}^5$ - $\text{C}^5$  (2.04, 39.27),  $\text{H}^{2\text{eq},10\text{eq}}$ - $\text{C}^{2,10}$  (2.75, 57.36),  $\text{H}^{11}$ - $\text{C}^{11}$  (4.40, 48.76),  $\text{H}^{17}$ - $\text{C}^{17}$  (4.18, 26.73) and  $\text{H}^{16}$ - $\text{C}^{16}$  (7.89, 124.17) ppm. The heteronuclear couplings of protons with carbon atoms through two or more bonds were determined by  $^1\text{H}$ - $^{13}\text{C}$  HMBC spectroscopy for the following pairs in the compound:  $\text{H}^{17}$ - $\text{C}^{16}$  (4.17, 124.06),  $\text{H}^{17}$ - $\text{C}^{15}$  (4.17, 144.44),  $\text{H}^{17}$ - $\text{C}^{19}$  (4.17, 156.20);  $\text{H}^{11}$ - $\text{C}^{21}$  (7.47, 125.65),  $\text{H}^{21}$ - $\text{C}^{19}$  (7.47, 148.52);  $\text{H}^{16}$ - $\text{C}^{16}$  (8.23, 125.97),  $\text{H}^{16}$ - $\text{C}^5$  (4.40, 38.88);  $\text{H}^{16}$ - $\text{C}^{16}$  (7.84, 124.32) and  $\text{H}^{16}$ - $\text{C}^{15}$  (7.84, 144.44) ppm.

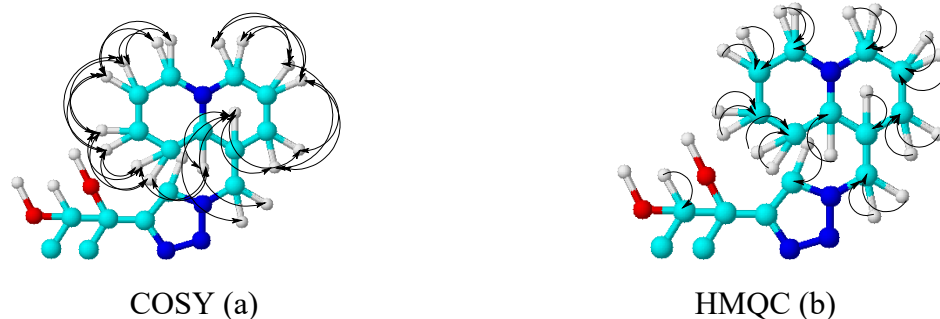

**Supplementary Figure S2. Scheme of correlations in the COSY (a) and HMQC (b) spectra of compound 6.**

$^1\text{H}$ - $^1\text{H}$  COSY spectra of the compound demonstrated the spin-spin couplings through three bonds of the neighboring methine-methylene groups of  $\text{H}^5$ - $\text{H}^{11}$  (2.14, 4.50 and 4.50, 2.14) ppm. The heteronuclear couplings of protons with carbon atoms through a single bond were established by  $^1\text{H}$ - $^{13}\text{C}$  HMQC spectroscopy for the following pairs in the compound:  $\text{H}^{22}$ - $\text{C}^{22}$  (1.02, 16.99),  $\text{H}^{21}$ - $\text{C}^{21}$  (1.51, 23.15),  $\text{H}^{4\text{ax}}$ - $\text{C}^4$  (1.19, 26.20),  $\text{H}^{4\text{eq}}$ - $\text{C}^4$  (1.30, 26.30),  $\text{H}^{7\text{ax}}$ - $\text{C}^7$  (1.45, 29.15),  $\text{H}^{7\text{eq}}$ - $\text{C}^7$  (1.55, 29.17),  $\text{H}^{2\text{ax},10\text{ax}}$ - $\text{C}^{2,10}$  (1.91, 57.53),  $\text{H}^{2\text{eq},10\text{eq}}$ - $\text{C}^{2,10}$  (2.76, 57.53),  $\text{H}^6$ - $\text{C}^6$  (2.02, 64.40),  $\text{H}^5$ - $\text{C}^5$  (2.14, 39.43),  $\text{H}^{19}$ - $\text{C}^{19}$  (3.88 and 4.05, 74.36 and 74.54),  $\text{H}^{11}$ - $\text{C}^{11}$  (4.48, 48.48) and  $\text{H}^{16}$ - $\text{C}^{16}$  (7.45, 121.95) ppm. The heteronuclear couplings of protons with carbon atoms through two or more bonds were defined by  $^1\text{H}$ - $^{13}\text{C}$  HMBC spectroscopy for the following pairs in the compound:  $\text{H}^{22}$ - $\text{C}^{19}$  (1.06, 73.35);  $\text{H}^{21}$ - $\text{C}^{17}$  (1.38, 73.58) and  $\text{H}^{21}$ - $\text{C}^{15}$  (1.38, 152.77) ppm.

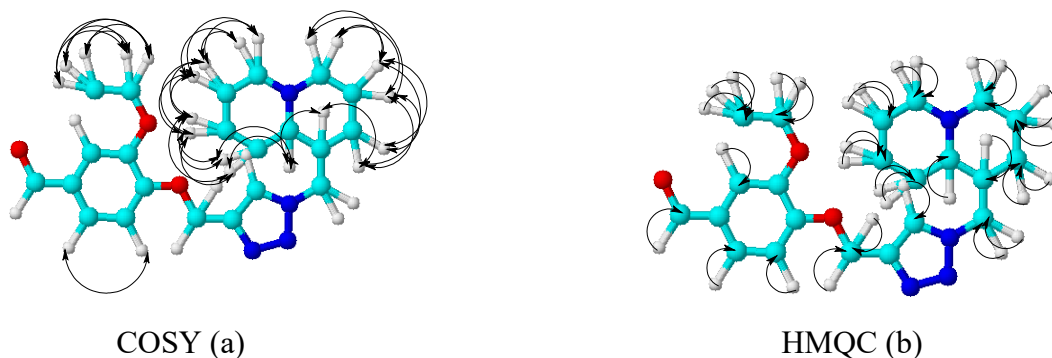

**Supplementary Figure S3. Scheme of correlations in the COSY (a) and HMQC (b) spectra of compound 7.**

$^1\text{H}$ - $^1\text{H}$  COSY spectra of the compound showed the spin-spin couplings through three bonds of the neighboring methyl and methylene groups of  $\text{H}^{27}$ - $\text{H}^{26}$  with the cross peak at 1.25, 4.03 and 4.03, 1.25 of the ethoxy fragment of the molecule, methine proton of the lupinine cycle with methylene proton  $\text{H}^5$ - $\text{H}^{11}$  (2.07, 4.48 and 4.48, 2.07), methylene-methylene protons of lupinine cycles of  $\text{H}^{2\text{ax},10\text{ax}}$ - $\text{H}^{2\text{eq},10\text{eq}}$  (1.79, 2.68 and 2.68, 1.79) and the aromatic methine protons of  $\text{H}^{24}$ - $\text{H}^{23}$  (7.32, 7.48 and 7.48, 7.32) ppm. The heteronuclear couplings of protons with carbon atoms through a single bond were established by  $^1\text{H}$ - $^{13}\text{C}$  HMQC spectroscopy for the following pairs in the compound:  $\text{H}^{27}$ - $\text{C}^{27}$  (1.25, 15.13),  $\text{H}^{3\text{ax}}$ - $\text{C}^3$  (1.26, 20.79),  $\text{H}^{4\text{ax}}$ - $\text{C}^4$  (1.28, 25.98),  $\text{H}^{4\text{eq}}$ - $\text{C}^4$  (1.48, 25.98),  $\text{H}^{7\text{eq}}$ - $\text{C}^7$  (1.38, 29.45),  $\text{H}^{2\text{ax},10\text{ax}}$ - $\text{C}^{2,10}$  (1.78, 57.70),  $\text{H}^6$ - $\text{C}^6$  (1.92, 64.67),  $\text{H}^{3\text{eq}}$ - $\text{C}^3$  (1.70, 20.60),  $\text{H}^5$ - $\text{C}^5$  (2.07, 39.06),  $\text{H}^{2\text{eq},10\text{eq}}$ - $\text{C}^{2,10}$  (2.68, 57.33),  $\text{H}^{11}$ - $\text{C}^{11}$  (4.48, 48.47),  $\text{H}^{26}$ - $\text{C}^{26}$  (4.01, 64.86),  $\text{H}^{17}$ - $\text{C}^{17}$  (5.21, 62.60),  $\text{H}^{21}$ - $\text{C}^{21}$  (7.32, 111.57),  $\text{H}^{24}$ - $\text{C}^{24}$  (7.31, 113.46),  $\text{H}^{23}$ - $\text{C}^{23}$  (7.46, 126.26) and  $\text{H}^{16}$ - $\text{C}^{16}$  (8.23, 126.26) ppm. The heteronuclear couplings of protons with carbon atoms through two or more bonds were detected by  $^1\text{H}$ - $^{13}\text{C}$  HMBC spectroscopy for the following pairs in the compound:  $\text{H}^{26}$ - $\text{C}^{27}$  (4.00, 15.48);  $\text{H}^{11}$ - $\text{C}^5$  (4.49, 39.00);  $\text{H}^{17}$ - $\text{C}^{16}$  (5.22, 125.65),  $\text{H}^{17}$ - $\text{C}^{15}$  (5.22, 142.72),  $\text{H}^{17}$ - $\text{C}^{20}$  (5.22, 153.35);  $\text{H}^{21}$ - $\text{C}^{21}$  (7.47, 125.65),  $\text{H}^{21}$ - $\text{C}^{19}$  (7.47, 148.52);  $\text{H}^{16}$ - $\text{C}^{16}$  (8.23, 125.97),  $\text{H}^{16}$ - $\text{C}^{15}$  (8.23, 142.72);  $\text{H}^{22}$ - $\text{C}^{21}$  (9.77, 111.80);  $\text{H}^{28}$ - $\text{C}^{28}$  (9.77, 192.33) and  $\text{H}^{28}$ - $\text{C}^{22}$  (9.77, 130.80) ppm.

**Supplementary Figure S4.1.**  $^1\text{H}$  NMR spectrum of 3-((1-(((1*S*,9*aR*)-octahydro-1*H*-quinolizine-1-yl)methyl)-1*H*-1,2,3-triazole-4-yl)methylthio)-1*H*-1,2,4-triazole-5-amine (5).

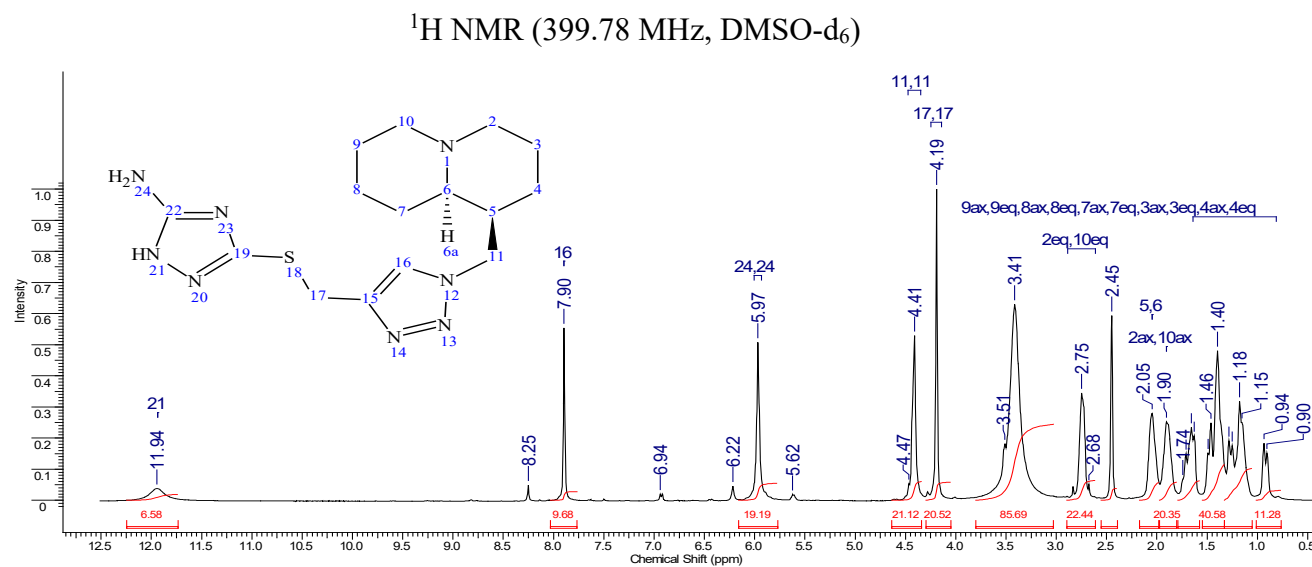

**Supplementary Figure S4.2.**  $^{13}\text{C}$  NMR spectrum of 3-((1-(((1*S*,9*aR*)-octahydro-1*H*-quinolizine-1-yl)methyl)-1*H*-1,2,3-triazole-4-yl)methylthio)-1*H*-1,2,4-triazole-5-amine (5).

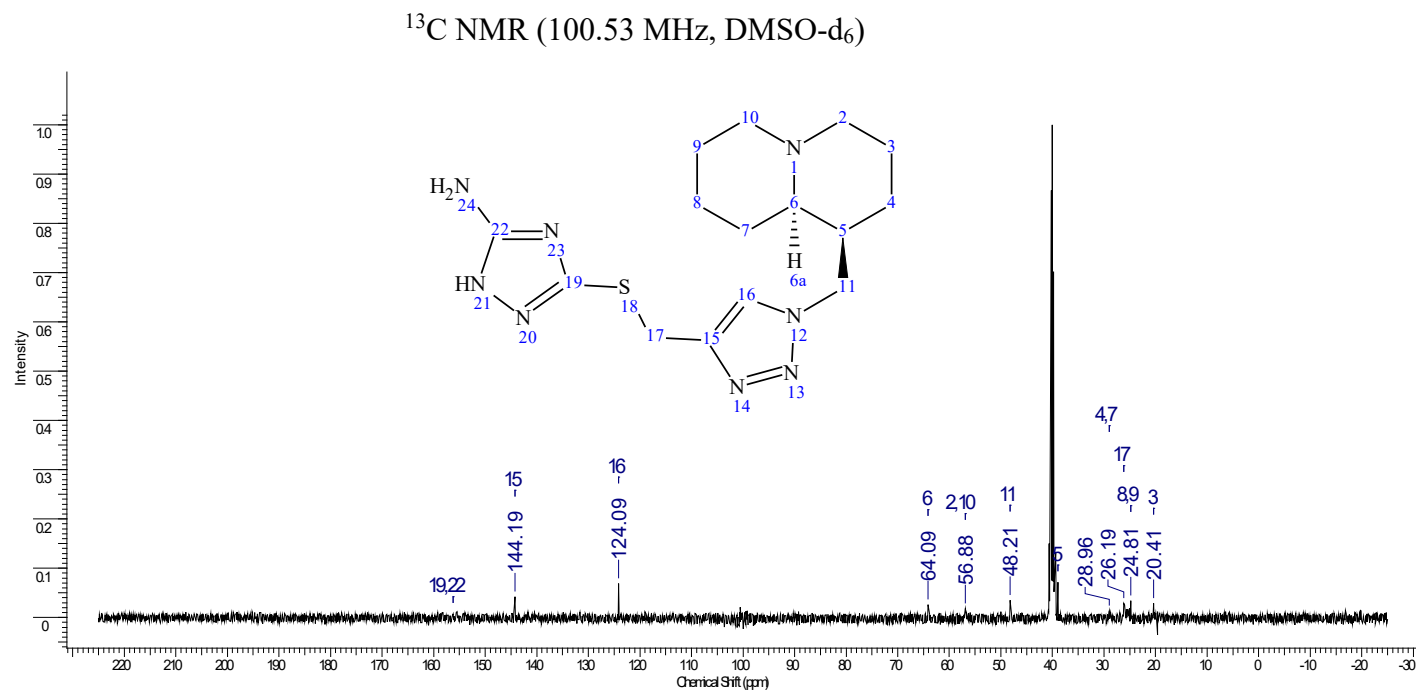

**Supplementary Figure S4.3. The mass spectrum of 3-((1-(((1*S*,9*aR*)-octahydro-1*H*-quinolizine-1-yl)methyl)-1*H*-1,2,3-triazole-4-yl)methylthio)-1*H*-1,2,4-triazole-5-amine (5).**

Lup-30\_220707183600 #2 RT: 0.08 AV: 1 NL: 1.05E7  
T: + c EI Full ms [ 14.50-370.50]

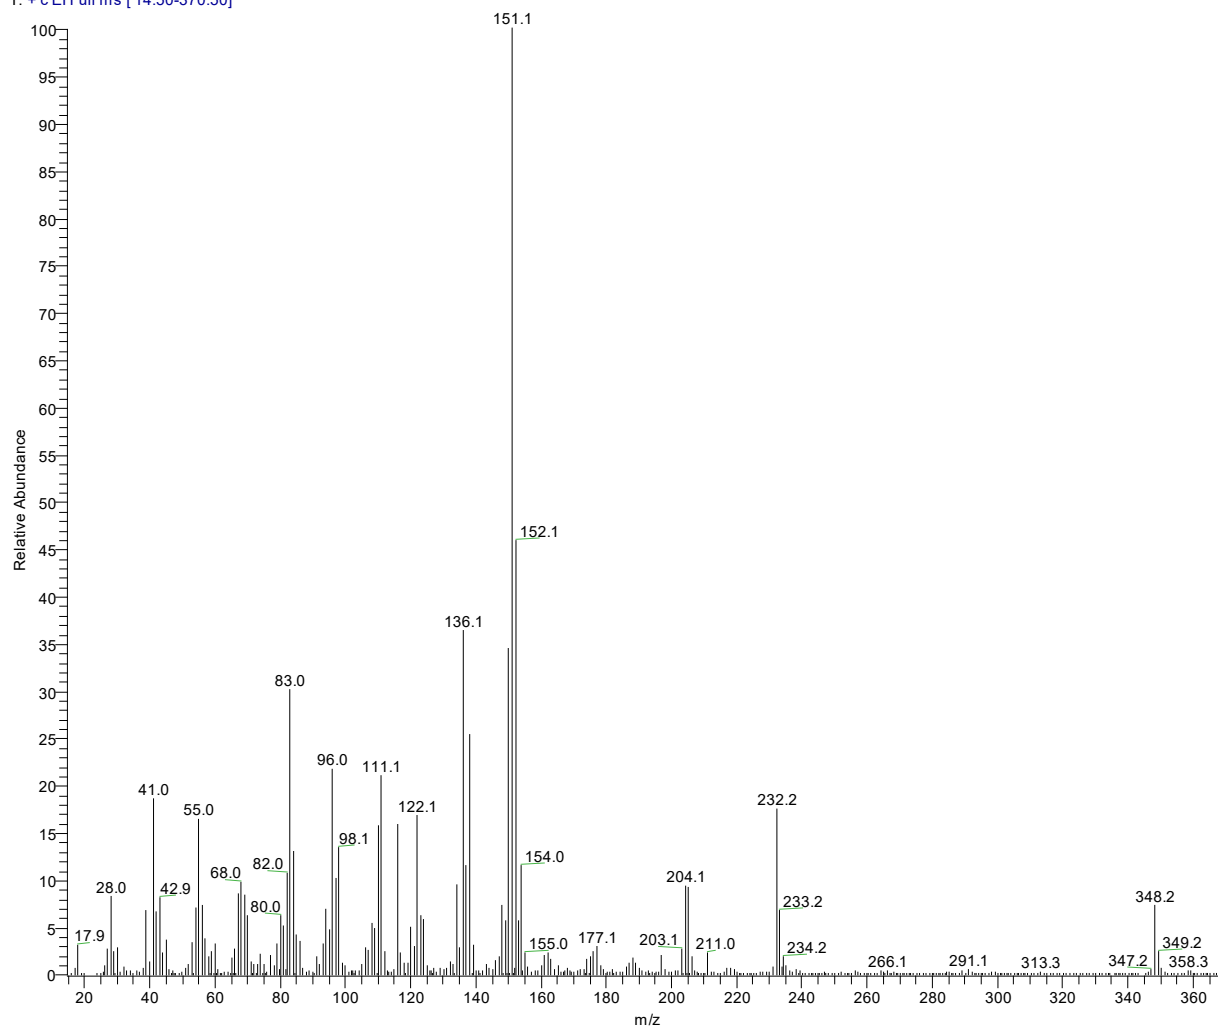

Supplementary Figure S5.1.  $^1\text{H}$  NMR spectrum of (2*R,S*)-2-(1-(((1*S*,9*aR*)-octahydro-1*H*-quinolizine-1-yl)methyl)-1*H*-1,2,3-triazole-4-yl)butane-2,3-diol (6a,b).

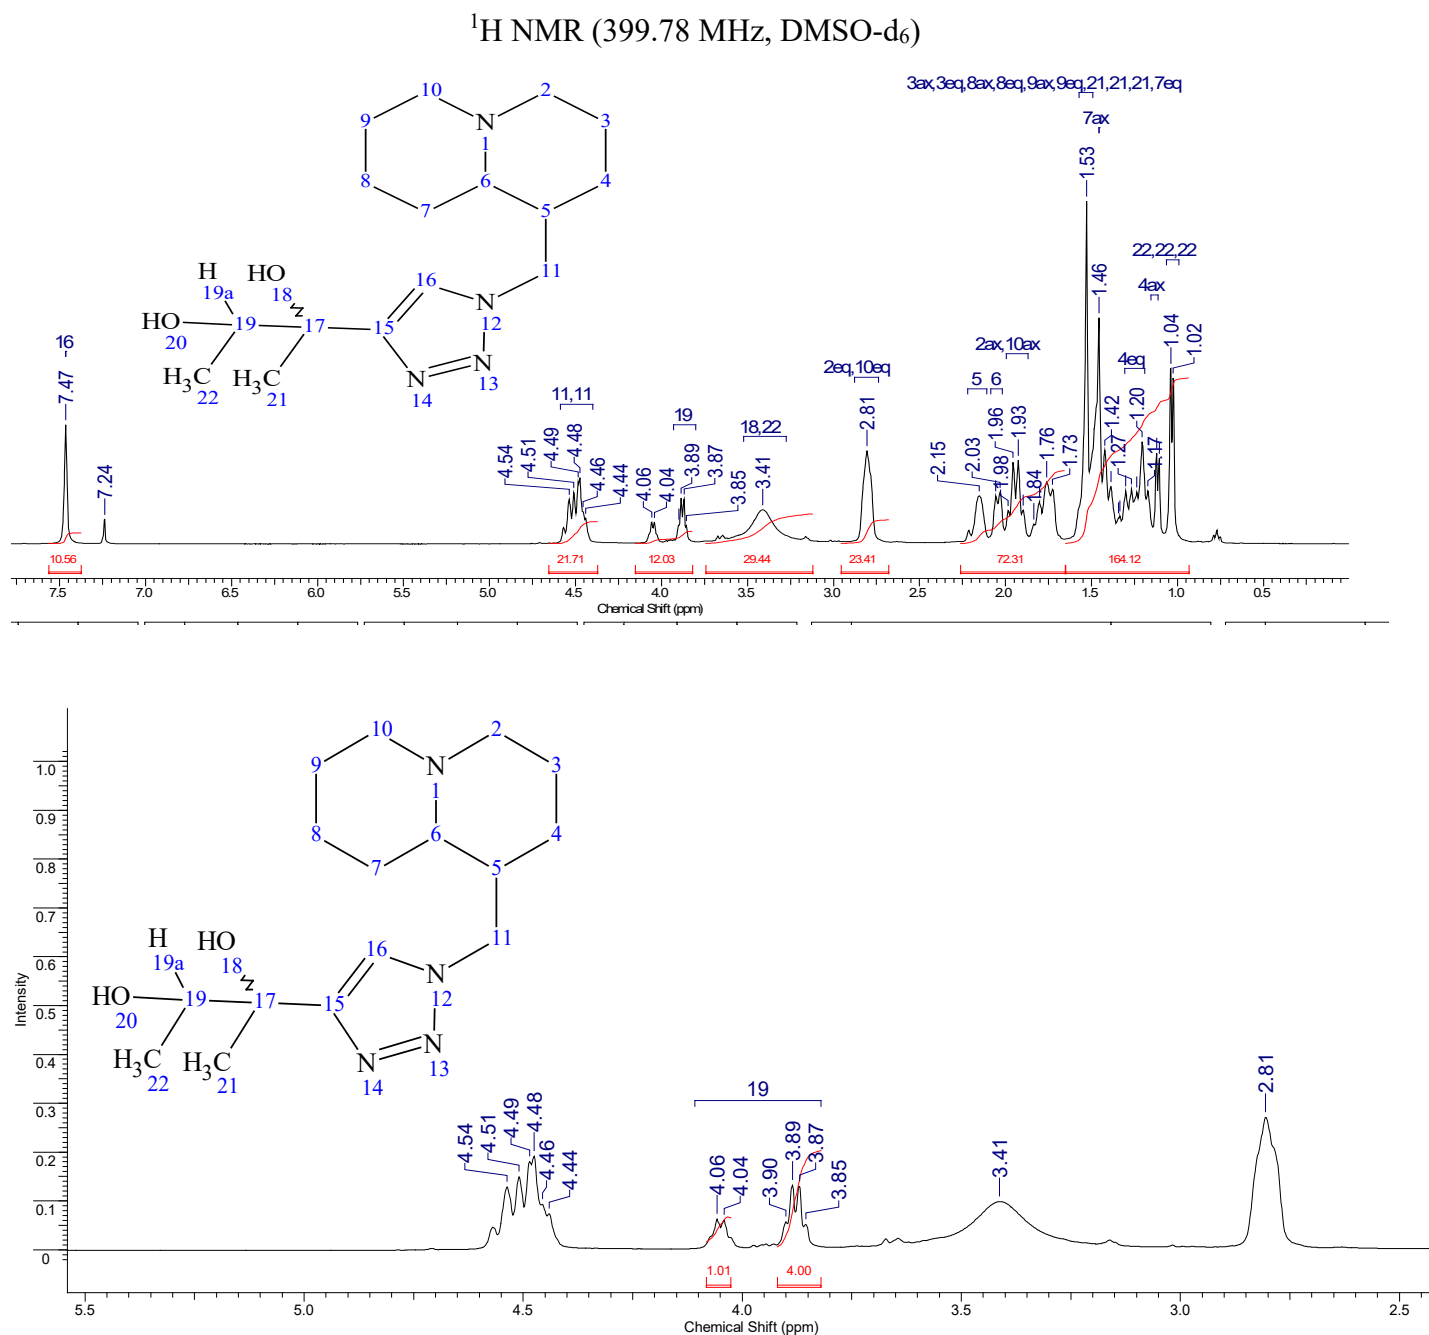

**Supplementary Figure S5.2.**  $^{13}\text{C}$  NMR spectrum of (2*R,S*)-2-(1-(((1*S*,9*aR*)-octahydro-1*H*-quinolizine-1-yl)methyl)-1*H*-1,2,3-triazole-4-yl)butane-2,3-diol (6a,b).

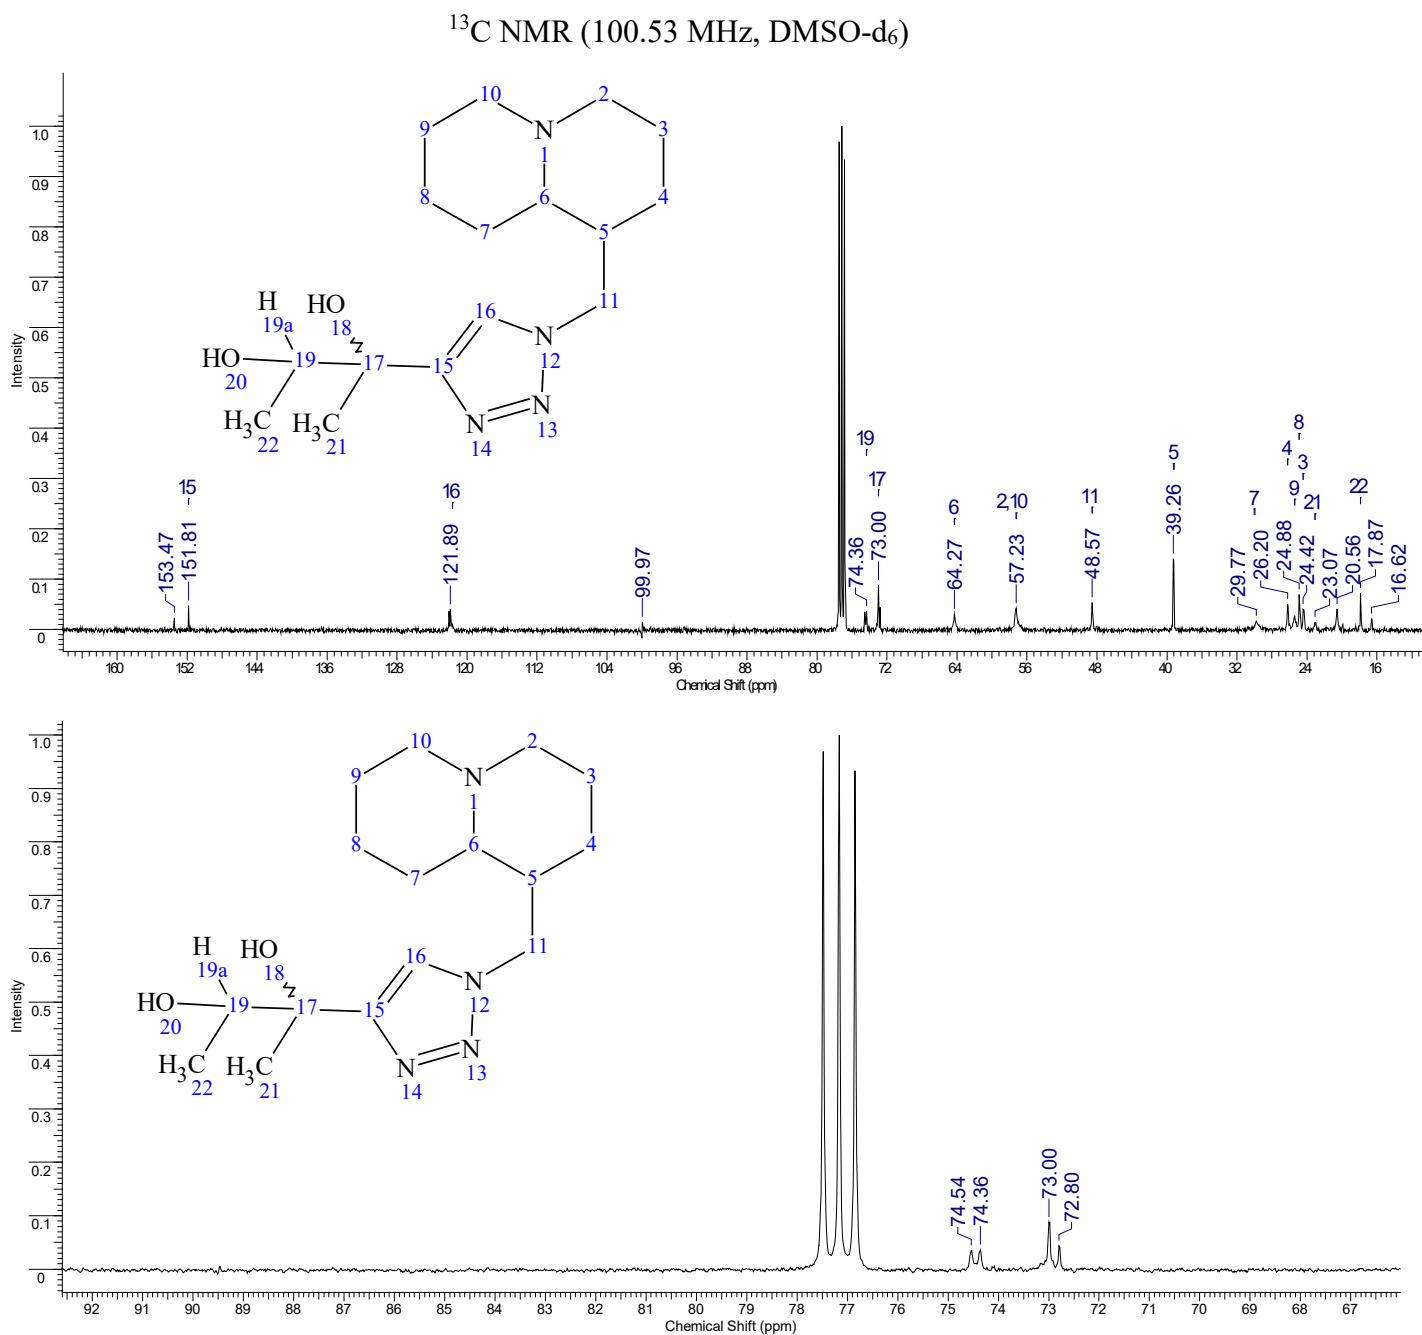



**Supplementary Figure S5.3. The mass spectrum of (2*R,S*)-2-(1-(((1*S*,9*aR*)-octahydro-1*H*-quinolizine-1-yl)methyl)-1*H*-1,2,3-triazole-4-yl)butane-2,3-diol (6a,b).**

Lup-32 #34 RT: 2.40 AV: 1 NL: 9.58E6  
T: + c EI Full ms [ 14.50-350.50]

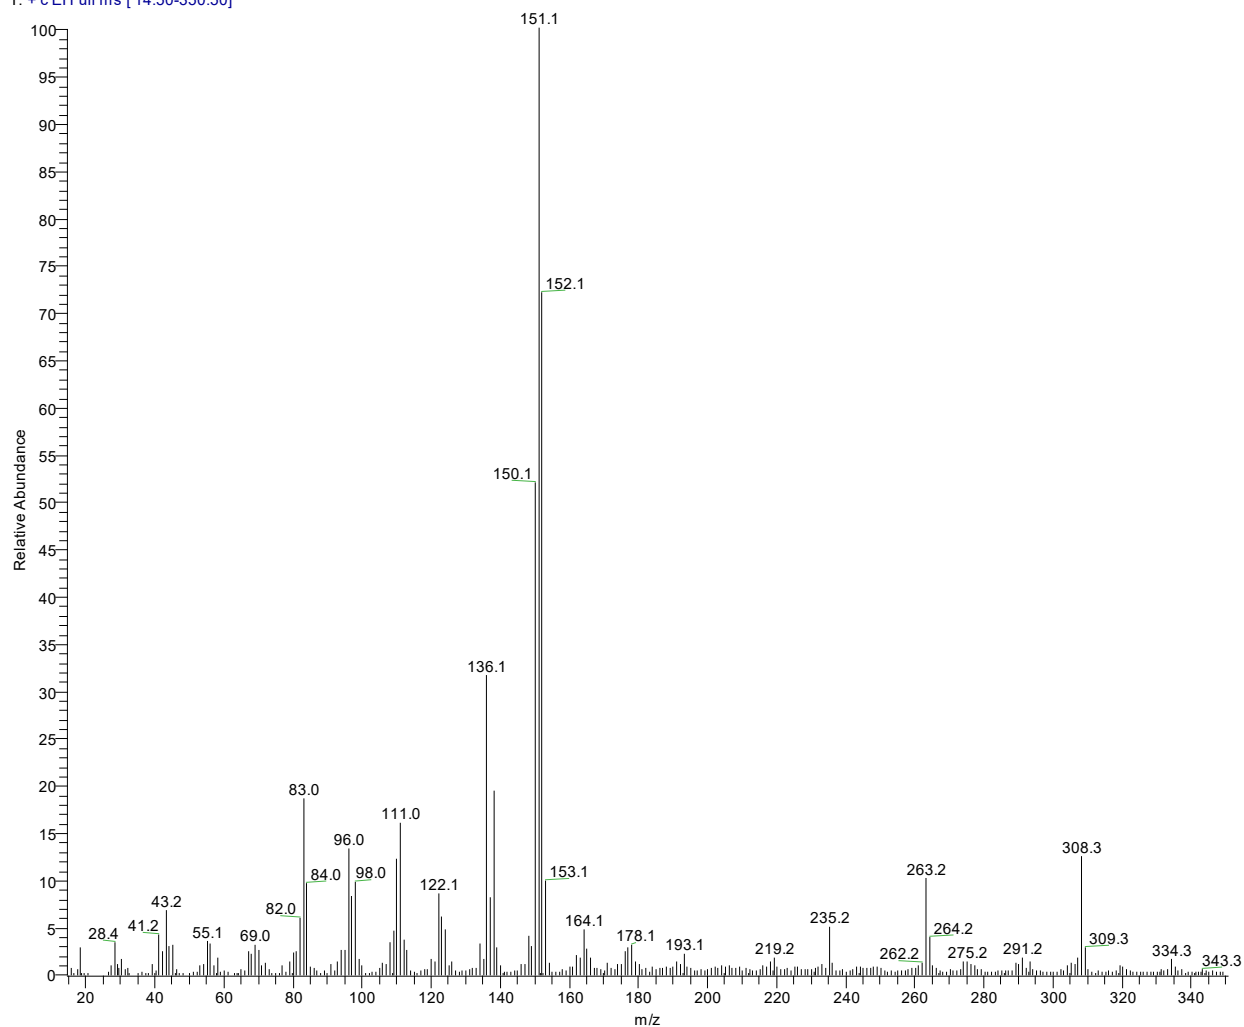

**Supplementary Figure S6.1.  $^1\text{H}$  NMR spectrum of 3-ethoxy-4-((1-(((1*S*,9*aR*)-octahydro-1*H*-quinolizine-1-yl)methyl)-1*H*-1,2,3-triazole-4-yl)methoxy)benzaldehyde (7).**

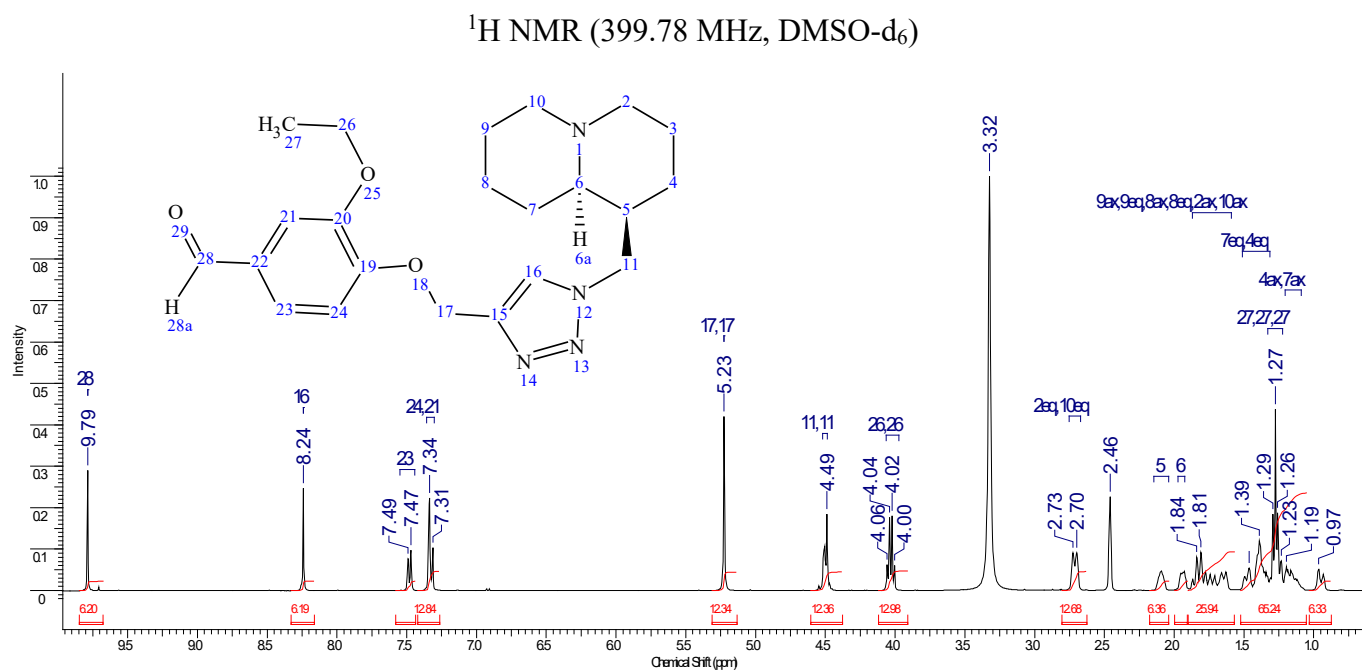

**Supplementary Figure S6.2.**  $^{13}\text{C}$  NMR spectrum of 3-ethoxy-4-((1-(((1*S*,9*aR*)-octahydro-1*H*-quinolizine-1-yl)methyl)-1*H*-1,2,3-triazole-4-yl)methoxy)benzaldehyde (7).

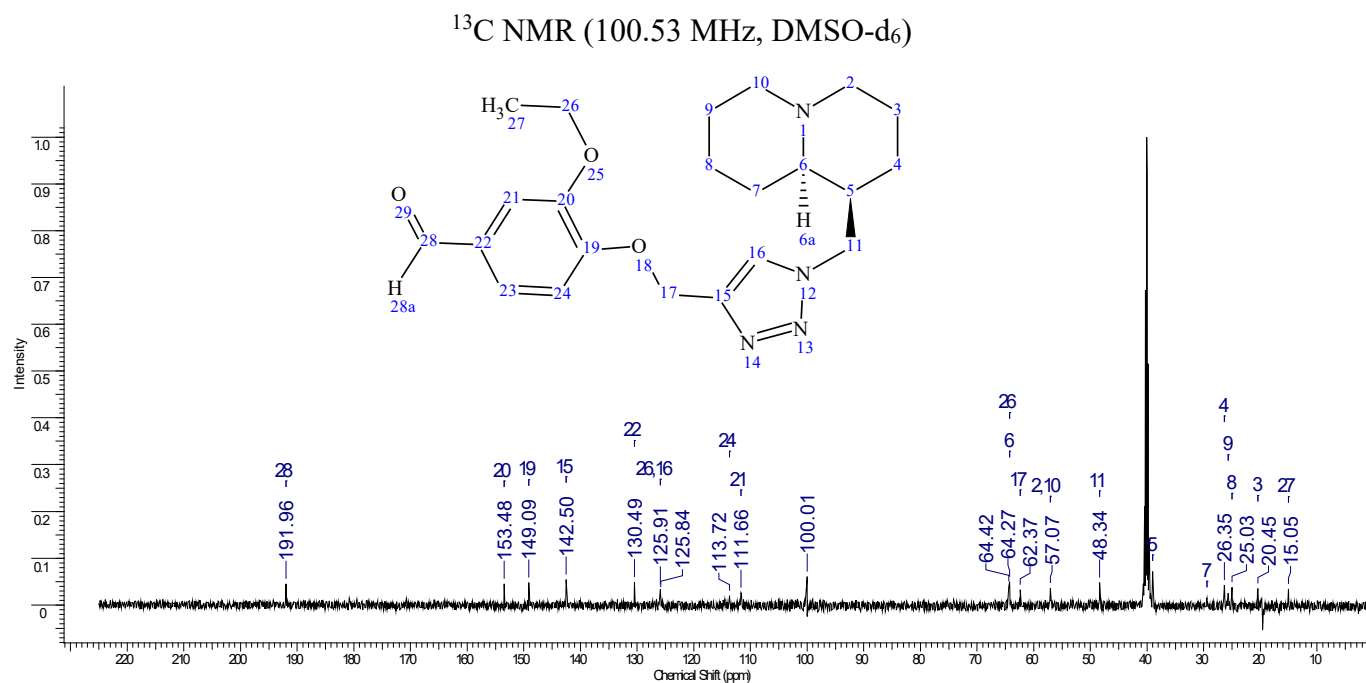

**Supplementary Figure S6.3. The mass spectrum of 3-ethoxy-4-((1-(((1*S*,9*aR*)-octahydro-1*H*-quinolizine-1-yl)methyl)-1*H*-1,2,3-triazole-4-yl)methoxy)benzaldehyde (7).**

Lup-33 #1 RT: 0.00 AV: 1 NL: 4.87E6  
T: + c EI Full ms [ 14.50-420.50]

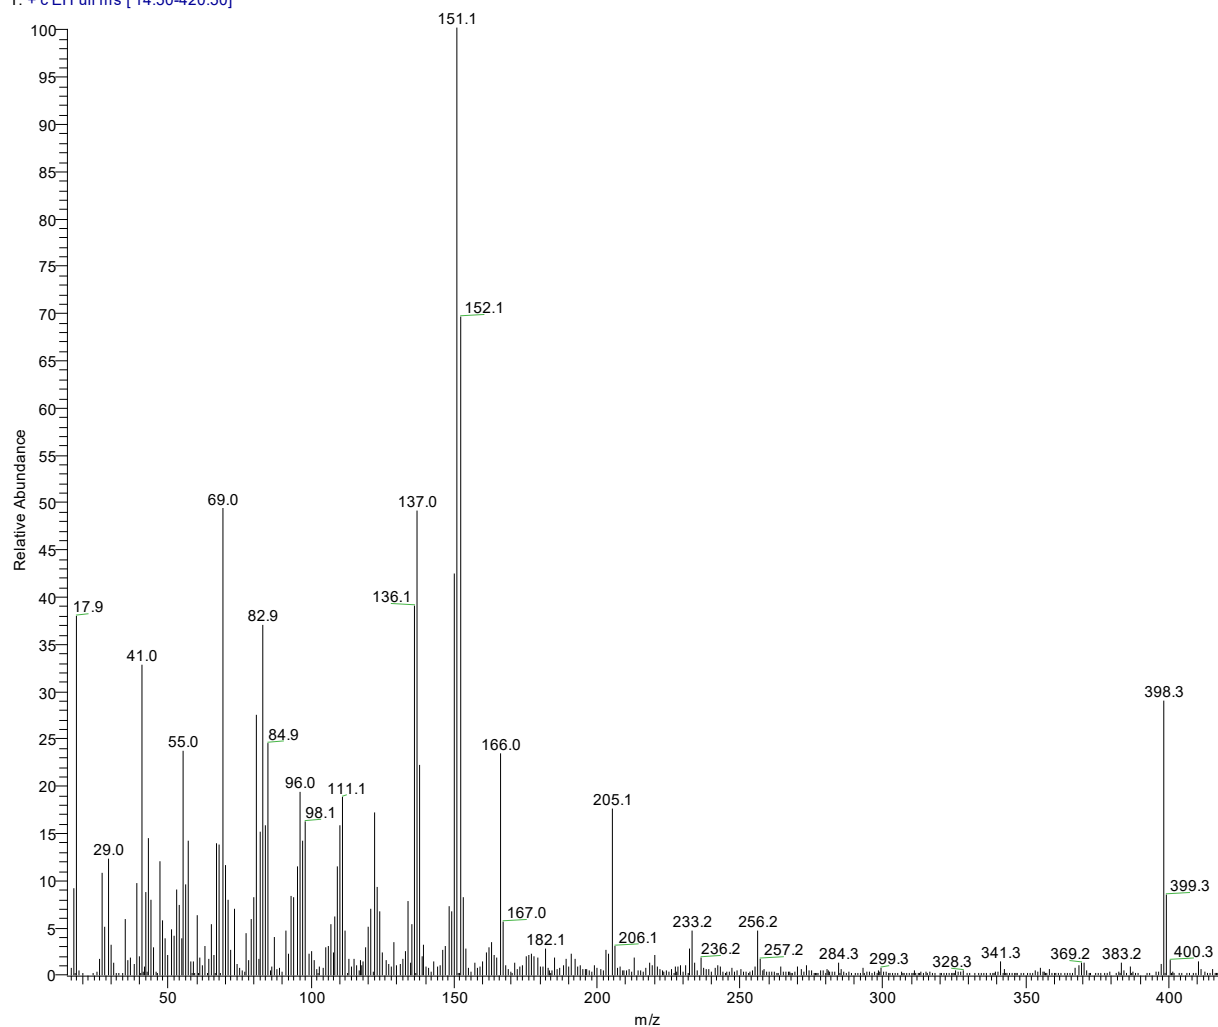

**Supplementary Table S1. Chemical structures of lupinine-based esters of different carboxylic acids under investigation (Vitas-M codes are indicated)**

|                                                                                                                      |                                                                                                                      |                                                                                                                        |
|----------------------------------------------------------------------------------------------------------------------|----------------------------------------------------------------------------------------------------------------------|------------------------------------------------------------------------------------------------------------------------|
| 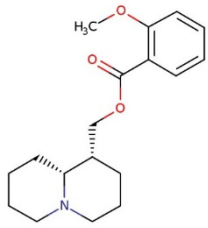 <p><b>18</b> (STOCK1N-00815)</p>   |  <p><b>19</b> (STOCK1N-20764)</p>   |  <p><b>20</b> (STOCK1N-27463)</p>   |
|  <p><b>21</b> (STOCK1N-08226)</p>   |  <p><b>22</b> (STOCK1N-20827)</p>   |  <p><b>23</b> (STOCK1N-27506)</p>   |
|  <p><b>24</b> (STOCK1N-09194)</p> |  <p><b>25</b> (STOCK1N-20963)</p>  |  <p><b>26</b> (STOCK1N-27613)</p>  |
|  <p><b>27</b> (STOCK1N-11775)</p> |  <p><b>28</b> (STOCK1N-21190)</p> |  <p><b>29</b> (STOCK1N-27767)</p> |
|  <p><b>30</b> (STOCK1N-11783)</p> |                                   |                                   |

|                                                                                                                  | 31 (STOCK1N-21225)                                                                                               | 32 (STOCK1N-28017)                                                                                                 |
|------------------------------------------------------------------------------------------------------------------|------------------------------------------------------------------------------------------------------------------|--------------------------------------------------------------------------------------------------------------------|
| 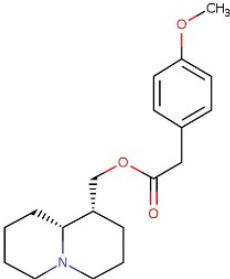<br><b>33</b> (STOCK1N-16368)   | <br><b>34</b> (STOCK1N-22221)   | <br><b>35</b> (STOCK1N-28128)   |
| <br><b>36</b> (STOCK1N-17850)   | <br><b>37</b> (STOCK1N-22377)   | <br><b>38</b> (STOCK1N-28515)   |
| <br><b>39</b> (STOCK1N-18175)  | <br><b>40</b> (STOCK1N-23538)  | <br><b>41</b> (STOCK1N-29877)  |
| <br><b>42</b> (STOCK1N-18223) | <br><b>43</b> (STOCK1N-25368) | <br><b>44</b> (STOCK1N-30716) |

|                                                                                                               |                                                                                                               |                                                                                                                 |
|---------------------------------------------------------------------------------------------------------------|---------------------------------------------------------------------------------------------------------------|-----------------------------------------------------------------------------------------------------------------|
| 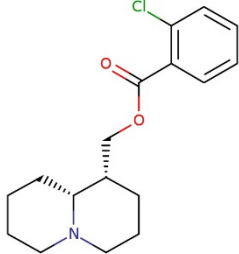 <p>45 (STOCK1N-18525)</p>   |  <p>46 (STOCK1N-25694)</p>   |  <p>47 (STOCK1N-32617)</p>   |
|  <p>48 (STOCK1N-18721)</p>   |  <p>49 (STOCK1N-25897)</p>   |  <p>50 (STOCK1N-41979)</p>   |
|  <p>51 (STOCK1N-18802)</p>  |  <p>52 (STOCK1N-25964)</p>  |  <p>53 (STOCK1N-42122)</p>  |
|  <p>54 (STOCK1N-19758)</p> |  <p>55 (STOCK1N-27190)</p> |  <p>56 (STOCK1N-42244)</p> |
|  <p>57 (STOCK1N-20315)</p> |  <p>58 (STOCK1N-27196)</p> |  <p>59 (STOCK1N-42364)</p> |

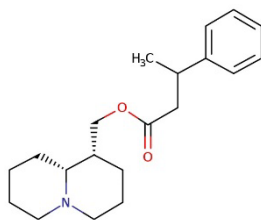

**60** (STOCK1N-20499)

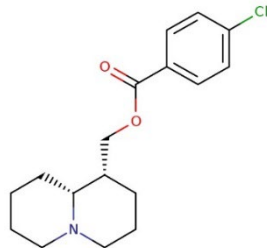

**61** (STOCK1N-27242)

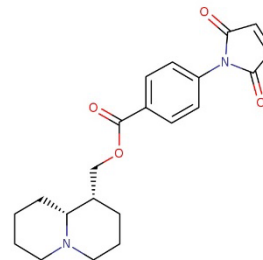

**62** (STOCK1N-43209)

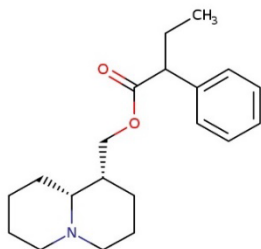

**63** (STOCK1N-20557)

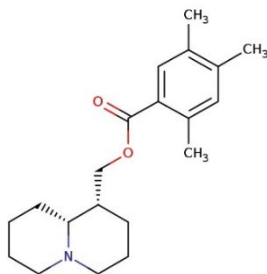

**64** (STOCK1N-27249)

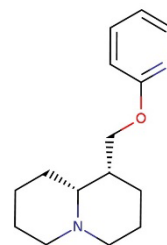

**65** (STOCK1N-43872)

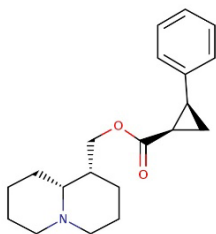

**66** (STOCK1N-20682)

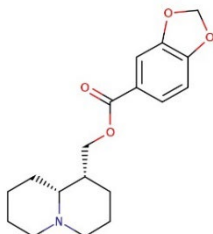

**67** (STOCK1N-27417)



**Supplementary Figure S7. 2D diagram of ligand-receptor interactions obtained on docking of compound 15 in AChE. Blue dashed lines – hydrogen bonding interactions. Red dashed line – steric interaction.**

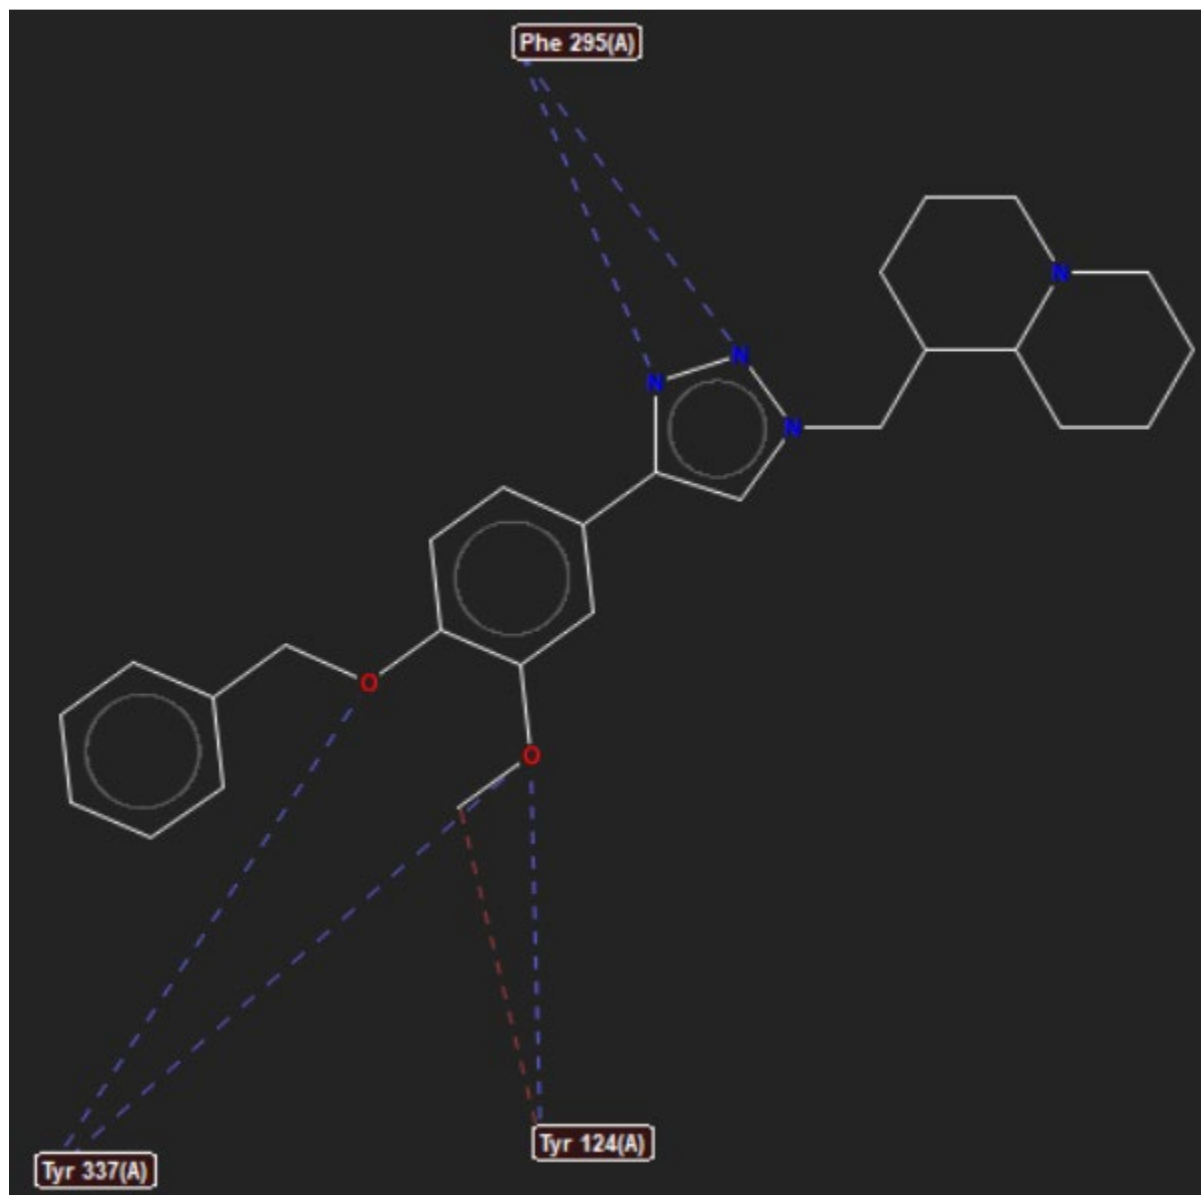

**Supplementary Table S2. Chemical formulas, selected ADME parameters of the lupinine-based esters calculated with SwissADME web tool, and manually added indicator variable for the quaternary  $sp^3$  carbon atom (Q).**

| Compound | Formula                                                                       | MW     | N <sub>rot</sub> | MR     | Silicos-IT LogS <sub>w</sub> | Q |
|----------|-------------------------------------------------------------------------------|--------|------------------|--------|------------------------------|---|
| 18       | C <sub>18</sub> H <sub>25</sub> NO <sub>3</sub>                               | 303.4  | 5                | 90.06  | -3.98                        | 0 |
| 19       | C <sub>19</sub> H <sub>27</sub> NO <sub>2</sub>                               | 301.42 | 6                | 92.96  | -4.66                        | 0 |
| 20       | C <sub>22</sub> H <sub>31</sub> NO <sub>2</sub>                               | 341.49 | 5                | 105.15 | -5.21                        | 1 |
| 21       | C <sub>14</sub> H <sub>26</sub> N <sub>2</sub> O <sub>2</sub>                 | 254.37 | 5                | 76.47  | -2.23                        | 0 |
| 22       | C <sub>14</sub> H <sub>24</sub> ClNO <sub>2</sub>                             | 273.8  | 6                | 78.08  | -3.18                        | 0 |
| 23       | C <sub>17</sub> H <sub>22</sub> Cl <sub>2</sub> N <sub>2</sub> O <sub>2</sub> | 357.27 | 5                | 98.09  | -5.1                         | 0 |
| 24       | C <sub>17</sub> H <sub>24</sub> N <sub>2</sub> O <sub>2</sub>                 | 288.38 | 5                | 88.07  | -3.91                        | 0 |
| 25       | C <sub>21</sub> H <sub>29</sub> NO <sub>4</sub>                               | 359.46 | 4                | 103.04 | -4.79                        | 0 |
| 26       | C <sub>19</sub> H <sub>27</sub> NO <sub>4</sub>                               | 333.42 | 6                | 96.55  | -4.09                        | 0 |
| 27       | C <sub>17</sub> H <sub>22</sub> N <sub>2</sub> O <sub>4</sub>                 | 318.37 | 5                | 92.39  | -3.22                        | 0 |
| 28       | C <sub>19</sub> H <sub>27</sub> NO <sub>3</sub>                               | 317.42 | 6                | 94.49  | -4.02                        | 0 |
| 29       | C <sub>20</sub> H <sub>29</sub> NO <sub>3</sub>                               | 331.45 | 6                | 99.67  | -4.4                         | 0 |
| 30       | C <sub>17</sub> H <sub>30</sub> N <sub>2</sub> O <sub>2</sub>                 | 294.43 | 5                | 88.78  | -2.83                        | 0 |
| 31       | C <sub>18</sub> H <sub>25</sub> NO <sub>3</sub>                               | 303.4  | 5                | 90.06  | -3.98                        | 0 |
| 32       | C <sub>18</sub> H <sub>25</sub> NO <sub>2</sub>                               | 287.4  | 5                | 88.15  | -4.26                        | 0 |
| 33       | C <sub>19</sub> H <sub>27</sub> NO <sub>3</sub>                               | 317.42 | 6                | 94.64  | -4.38                        | 0 |
| 34       | C <sub>15</sub> H <sub>21</sub> NO <sub>2</sub> S                             | 279.4  | 4                | 81.44  | -3.13                        | 0 |
| 35       | C <sub>20</sub> H <sub>29</sub> NO <sub>5</sub>                               | 363.45 | 7                | 103.04 | -4.2                         | 0 |
| 36       | C <sub>18</sub> H <sub>25</sub> NO <sub>3</sub>                               | 303.4  | 6                | 89.68  | -4                           | 0 |
| 37       | C <sub>14</sub> H <sub>25</sub> NO <sub>2</sub>                               | 239.35 | 5                | 73.28  | -2.55                        | 0 |
| 38       | C <sub>14</sub> H <sub>25</sub> NO <sub>2</sub>                               | 239.35 | 4                | 73.28  | -2.18                        | 0 |
| 39       | C <sub>16</sub> H <sub>27</sub> NO <sub>2</sub>                               | 265.39 | 4                | 80.78  | -2.51                        | 0 |
| 40       | C <sub>18</sub> H <sub>25</sub> NO <sub>2</sub>                               | 287.4  | 4                | 88.53  | -4.25                        | 0 |
| 41       | C <sub>17</sub> H <sub>22</sub> Cl <sub>2</sub> N <sub>2</sub> O <sub>2</sub> | 357.27 | 5                | 98.09  | -5.1                         | 0 |
| 42       | C <sub>13</sub> H <sub>22</sub> BrNO <sub>2</sub>                             | 304.22 | 5                | 76.34  | -3                           | 0 |
| 43       | C <sub>20</sub> H <sub>27</sub> NO <sub>3</sub>                               | 329.43 | 6                | 99.77  | -4.05                        | 0 |
| 44       | C <sub>20</sub> H <sub>31</sub> NO <sub>4</sub>                               | 349.46 | 4                | 99.22  | -3.19                        | 0 |
| 45       | C <sub>17</sub> H <sub>22</sub> ClNO <sub>2</sub>                             | 307.82 | 4                | 88.58  | -4.46                        | 0 |
| 46       | C <sub>19</sub> H <sub>27</sub> NO <sub>4</sub>                               | 333.42 | 6                | 96.55  | -4.09                        | 0 |
| 47       | C <sub>19</sub> H <sub>28</sub> N <sub>2</sub> O <sub>4</sub>                 | 348.44 | 7                | 101.06 | -4.13                        | 0 |
| 48       | C <sub>14</sub> H <sub>23</sub> NO <sub>2</sub>                               | 237.34 | 4                | 71.17  | -1.95                        | 0 |
| 49       | C <sub>21</sub> H <sub>29</sub> NO <sub>4</sub>                               | 359.46 | 7                | 106.26 | -4.16                        | 0 |
| 50       | C <sub>15</sub> H <sub>24</sub> BrNO <sub>2</sub>                             | 330.26 | 4                | 83.58  | -3.15                        | 1 |
| 51       | C <sub>22</sub> H <sub>30</sub> ClNO <sub>2</sub>                             | 375.93 | 5                | 110.16 | -5.8                         | 1 |
| 52       | C <sub>17</sub> H <sub>23</sub> ClN <sub>2</sub> O <sub>2</sub>               | 322.83 | 5                | 93.08  | -4.51                        | 0 |
| 53       | C <sub>14</sub> H <sub>23</sub> NO <sub>4</sub>                               | 269.34 | 6                | 74.56  | -1.83                        | 0 |
| 54       | C <sub>22</sub> H <sub>33</sub> NO <sub>2</sub>                               | 343.5  | 7                | 107.54 | -5.46                        | 0 |

|    |                                                               |        |   |        |       |   |
|----|---------------------------------------------------------------|--------|---|--------|-------|---|
| 55 | C <sub>20</sub> H <sub>29</sub> NO <sub>3</sub>               | 331.45 | 7 | 99.29  | -4.42 | 0 |
| 56 | C <sub>19</sub> H <sub>26</sub> BrNO <sub>3</sub>             | 396.32 | 6 | 102.34 | -5.17 | 0 |
| 57 | C <sub>21</sub> H <sub>33</sub> NO <sub>2</sub>               | 331.49 | 4 | 100.33 | -3.38 | 1 |
| 58 | C <sub>15</sub> H <sub>27</sub> NO <sub>2</sub>               | 253.38 | 4 | 77.83  | -2.56 | 1 |
| 59 | C <sub>15</sub> H <sub>21</sub> NO <sub>3</sub>               | 263.33 | 4 | 75.83  | -3.08 | 0 |
| 60 | C <sub>20</sub> H <sub>29</sub> NO <sub>2</sub>               | 315.45 | 6 | 97.77  | -4.68 | 0 |
| 61 | C <sub>17</sub> H <sub>22</sub> ClNO <sub>2</sub>             | 307.82 | 4 | 88.58  | -4.46 | 0 |
| 62 | C <sub>21</sub> H <sub>24</sub> N <sub>2</sub> O <sub>4</sub> | 368.43 | 5 | 108.14 | -3.57 | 0 |
| 63 | C <sub>20</sub> H <sub>29</sub> NO <sub>2</sub>               | 315.45 | 6 | 97.77  | -4.68 | 0 |
| 64 | C <sub>20</sub> H <sub>29</sub> NO <sub>2</sub>               | 315.45 | 4 | 98.47  | -5.01 | 0 |
| 65 | C <sub>15</sub> H <sub>22</sub> N <sub>2</sub> O              | 246.35 | 3 | 76.57  | -3.55 | 0 |
| 66 | C <sub>20</sub> H <sub>27</sub> NO <sub>2</sub>               | 313.43 | 5 | 95.65  | -4.21 | 0 |
| 67 | C <sub>18</sub> H <sub>23</sub> NO <sub>4</sub>               | 317.38 | 4 | 89.63  | -3.6  | 0 |

**Abbreviations:** molecular weight (MW), number of rotatable bonds (N<sub>rot</sub>), molar refraction (MR), and water solubility characteristic (SILICOS-IT Log S<sub>w</sub>).

**Supplementary Table S3. Experimentally determined, calculated, and LOO-predicted classes for AChE inhibitory activity of the lupinine-based esters of different carboxylic acids.**

| Compound | Observed | LDA        |               |
|----------|----------|------------|---------------|
|          |          | Calculated | LOO-Predicted |
| 18       | NA       | NA         | NA            |
| 19       | NA       | NA         | NA            |
| 20       | NA       | NA         | NA            |
| 21       | NA       | NA         | NA            |
| 22       | Active   | NA         | NA            |
| 23       | NA       | Active     | Active        |
| 24       | NA       | NA         | NA            |
| 25       | Active   | Active     | Active        |
| 26       | NA       | NA         | NA            |
| 27       | NA       | Active     | Active        |
| 28       | NA       | NA         | NA            |
| 29       | NA       | Active     | Active        |
| 30       | NA       | NA         | NA            |
| 31       | NA       | NA         | NA            |
| 32       | NA       | NA         | NA            |
| 33       | NA       | NA         | NA            |

|    |        |        |        |
|----|--------|--------|--------|
| 34 | NA     | NA     | NA     |
| 35 | NA     | Active | Active |
| 36 | NA     | NA     | NA     |
| 37 | NA     | NA     | NA     |
| 38 | NA     | NA     | NA     |
| 39 | NA     | NA     | NA     |
| 40 | NA     | NA     | NA     |
| 41 | Active | Active | NA     |
| 42 | NA     | NA     | NA     |
| 43 | Active | Active | Active |
| 44 | Active | Active | Active |
| 45 | NA     | NA     | Active |
| 46 | NA     | NA     | NA     |
| 47 | NA     | NA     | Active |
| 48 | NA     | NA     | NA     |
| 49 | Active | Active | Active |
| 50 | NA     | NA     | NA     |
| 51 | NA     | NA     | NA     |
| 52 | NA     | NA     | NA     |
| 53 | NA     | NA     | NA     |
| 54 | NA     | NA     | NA     |
| 55 | NA     | NA     | NA     |
| 56 | NA     | Active | Active |
| 57 | NA     | NA     | NA     |
| 58 | NA     | NA     | NA     |
| 59 | NA     | NA     | NA     |
| 60 | NA     | NA     | NA     |
| 61 | NA     | NA     | Active |
| 62 | NA     | Active | Active |
| 63 | NA     | NA     | NA     |
| 64 | Active | Active | Active |
| 65 | NA     | NA     | NA     |
| 66 | NA     | Active | Active |
| 67 | NA     | Active | Active |
